# Supplementary material for: Design of a Planner-Based Intervention to Facilitate Diet Behaviour Change in Type 2 Diabetes
Source: MDPI journal article supplement (doi:10.3390/s22072795), 2022-04-06
Supplement: s1 [file s1]

**Table S1.** Action to be taken to support the relevant intervention functions associated with the three dimensions of the COM-B model for the barrier/facilitator theme Mental Health

| <b>Mental Health</b>     |                              |                                                                                                                                                                                                                                      |
|--------------------------|------------------------------|--------------------------------------------------------------------------------------------------------------------------------------------------------------------------------------------------------------------------------------|
| <b>COM-B</b>             | <b>Intervention Function</b> | <b>Action to be taken</b>                                                                                                                                                                                                            |
| Psychological Capability | Education                    | Teaching on the different components of self-efficacy.                                                                                                                                                                               |
|                          | Training                     | Training in self-reflection on the components of self-efficacy.                                                                                                                                                                      |
|                          | Enablement                   | Programme of Mindfulness to support the execution of behaviours by enhancing psychological capability.<br>Programme of water consumption to build self-efficacy in non-food task.                                                    |
| Reflective Motivation    | Education                    | Teaching different components of self-efficacy carried out in planner.                                                                                                                                                               |
|                          | Persuasion                   | Use inspirational quotes, inspirational images and other celebratory/congratulatory imagery and text throughout the planner to enhance the participants' feelings of self-belief and self-efficacy as they work through the planner. |
| Automatic Motivation     | Training                     | Training using repeated exposure to positive emotions elicited using imagery and text in the planner.                                                                                                                                |
|                          | Persuasion                   | Use inspirational quotes, inspirational images and other celebratory/congratulatory imagery and text to help the participants experience positive emotions to enhance feelings of self-belief and self-efficacy.                     |
|                          | Environmental Restructuring  | Placement of planner in home where regularly visible to participant as reminder of intervention process and positive emotions associated with it.                                                                                    |
|                          | Enablement                   | Programme of Mindfulness to support emotional regulation and mental resilience.                                                                                                                                                      |

**Table S2.** Action to be taken to support the relevant intervention functions associated with the three dimensions of the COM-B model for the barrier/facilitator theme Social Support

| <b>Social Support</b>    |                              |                                                                                                                                                                                                                                            |
|--------------------------|------------------------------|--------------------------------------------------------------------------------------------------------------------------------------------------------------------------------------------------------------------------------------------|
| <b>COM-B</b>             | <b>Intervention Function</b> | <b>Action to be taken</b>                                                                                                                                                                                                                  |
| Psychological Capability | Education                    | Teaching different components of self-efficacy, which can be applied in family and social situation.                                                                                                                                       |
|                          | Training                     | Training in self-reflection on the components of self-efficacy which can be applied in a family and social situation.                                                                                                                      |
|                          | Enablement                   | Programme of Mindfulness help emotional regulation & mental resilience to manage food behaviours in family and social situations.<br>Prompt participants seek support of family or friends.                                                |
| Social Opportunity       | Enablement                   | Programme of Mindfulness helps emotional regulation and mental resilience to be able to manage food behaviours in family and social situations.<br>Prompt participants to seek support of family or friends                                |
| Reflective Motivation    | Education                    | Teaching on the different components of self-efficacy, which can be applied in a family and social situation.<br>Teaching on the social consequences of behaviour.                                                                         |
|                          | Persuasion                   | Inspirational quotes, inspirational images and other celebratory/congratulatory imagery and text to enhance the participants' feelings of self-belief and self-efficacy in social and family situations.                                   |
| Automatic Motivation     | Training                     | Training in self-reflection on the components of self-efficacy can be applied in family and social situations.                                                                                                                             |
|                          | Persuasion                   | Inspirational quotes, inspirational images and other celebratory/congratulatory imagery and text help participants experience positive emotions to enhance feelings of self-belief and self-efficacy when in family and social situations. |
|                          | Enablement                   | Programme of Mindfulness to support emotional regulation and mental resilience, including in family and social situations.                                                                                                                 |

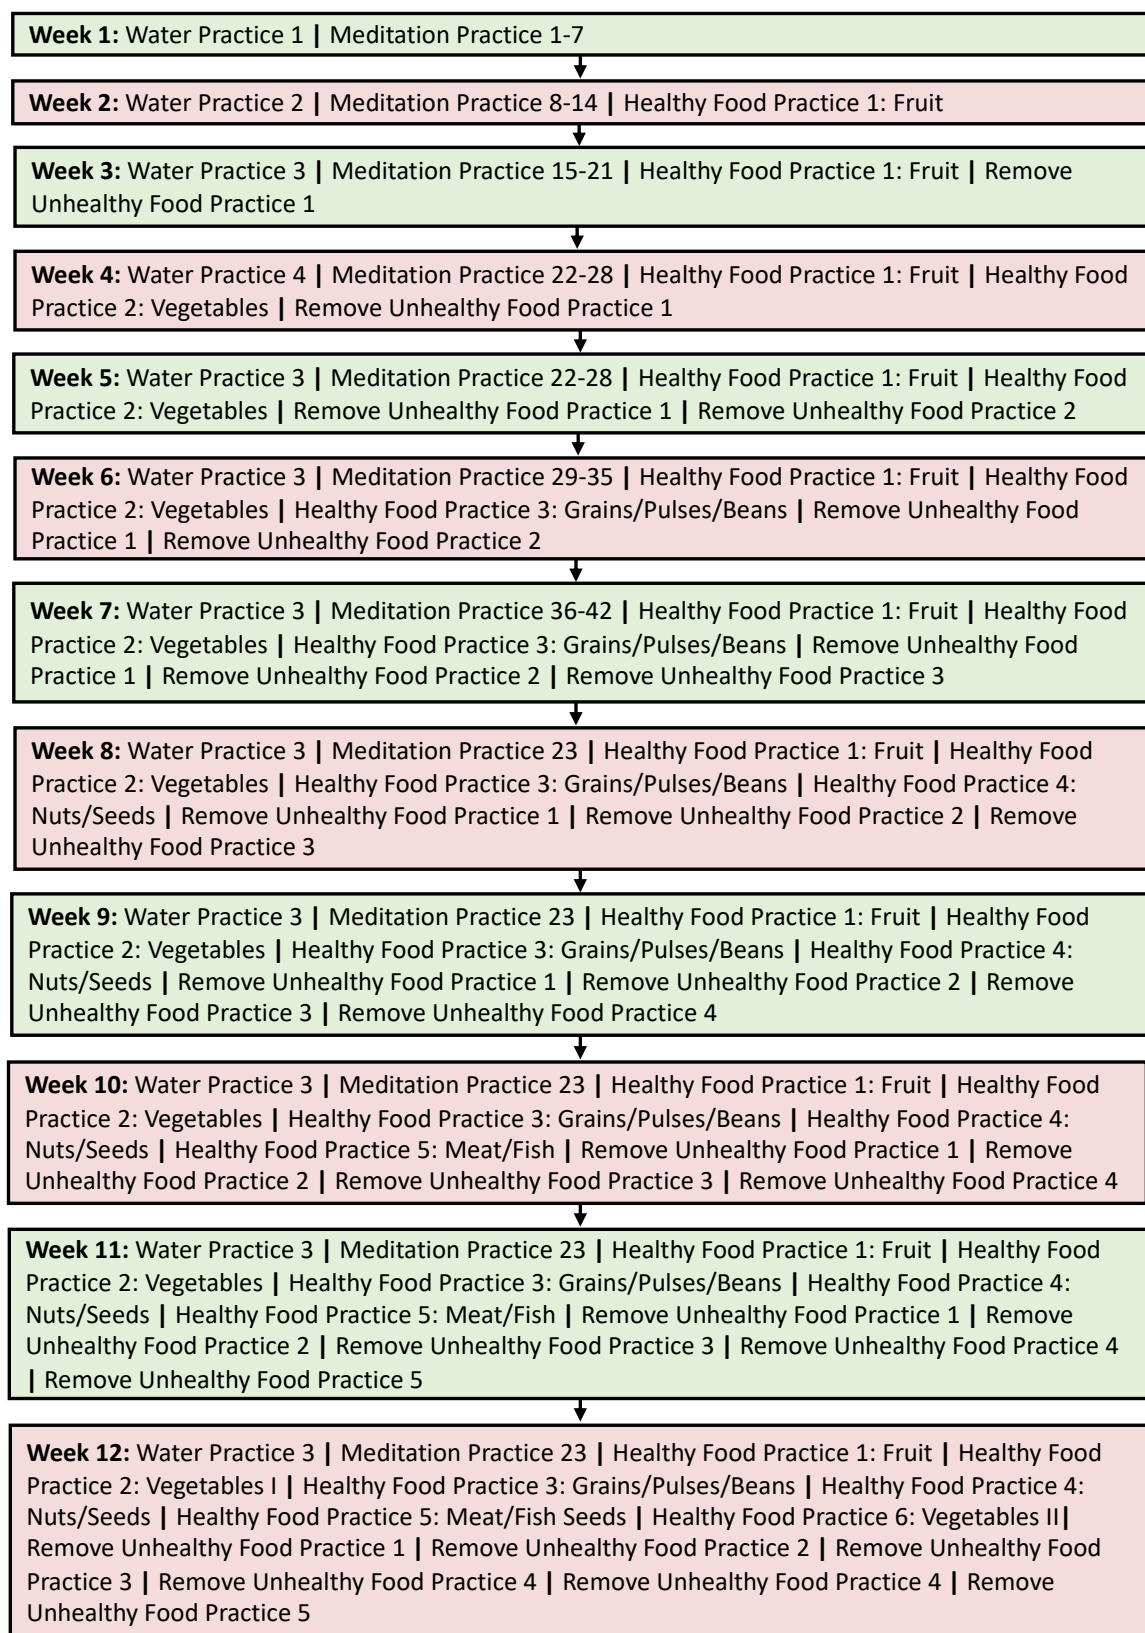

**Figure S1.** Proposed Planner Content over the 12 weeks.
